# Supplementary material for: Marine biodiversity research in the Ryukyu Islands, Japan: current status and trends
Source: PeerJ. 2019 Apr 12;7:e6532. doi: 10.7717/peerj.6532 (PMC6464027; doi:10.7717/peerj.6532)
Supplement: Table S1 [file peerj-07-6532-s002.xlsx]

## Sheet: Sheet1
Supplementary Table S1 - Search terms for Web of Science and numbers of publications per year (1995-2017) for the Ryukyus, Red Sea, Great Barrier Reef, and Caribbean.
*search conducted on Sept. 20, 2017
	Apex predators				Connectivity				Coral bleaching				Coral reproduction				Herbivory				Marine protected areas				Porifera				Reef-associated bacteria
	TS=(Predatory fish* OR shark*)				TS=([(Structure or connectivity) AND (genetic* or population*) marine] OR (phyloge*) AND (marine) NOT community structure)				TS=(‘‘Coral bleaching’’ or ‘‘bleaching event’’)				TS=(Scleractinia* reproducti*)				TS=(Herbiv* AND coral-reef OR Graz* AND coral reef)				TS=((Marine reserve* or marine protected area* or no take zone* or no entry zone*) and (fisheries* or spillover* or catch* or fishing*))				TS=(Sponge* OR porifer* AND ‘‘coral reef’’)				TS=(Reef bacteria*)
	(Ryukyu* OR Nansei OR Okinawa*)	Red Sea	("great barrier reef")	Caribbean	(Ryukyu* OR Nansei OR Okinawa*)	Red Sea	("great barrier reef")	Caribbean	(Ryukyu* OR Nansei OR Okinawa*)	Red Sea	("great barrier reef")	Caribbean	(Ryukyu* OR Nansei OR Okinawa*)	Red Sea	("great barrier reef")	Caribbean	(Ryukyu* OR Nansei OR Okinawa*)	Red Sea	("great barrier reef")	Caribbean	(Ryukyu* OR Nansei OR Okinawa*)	Red Sea	("great barrier reef")	Caribbean	(Ryukyu* OR Nansei OR Okinawa*)	Red Sea	("great barrier reef")	Caribbean	(Ryukyu* OR Nansei OR Okinawa*)	Red Sea	("great barrier reef")	Caribbean
	Ryukyus	Red Sea	GBR	Caribbean	Ryukyus	Red Sea	GBR	Caribbean	Ryukyus	Red Sea	GBR	Caribbean	Ryukyus	Red Sea	GBR	Caribbean	Ryukyus	Red Sea	GBR	Caribbean	Ryukyus	Red Sea	GBR	Caribbean	Ryukyus	Red Sea	GBR	Caribbean	Ryukyus	Red Sea	GBR	Caribbean
1995			2	6	5	27	32	46			2	4		4	10	2		1	9	8		2	3	2	18	11	4	28	1	2	4	4
1996		2	3	6	2	28	37	61			1	1	2	2	8	1		6	16	13			1	1	21	11	8	36		2	8	2
1997		6	8	11	4	28	42	43		2	5	4	2	6	10	6		3	13	8		2	5	2	20	12	11	31	1	2	6	4
1998		5	7	10	10	29	43	68		1	2	7	3	6	7	9		6	12	12		6	5	4	22	10	8	41		6	10	6
1999	1	6	5	5	8	34	33	54		2	7	12	3	7	7	6		5	13	10		10	8	8	22	14	9	34	1	4	14	6
2000		4	9	12	7	33	41	43	2	2	7	5	3	8	9	6		2	9	11		8	13	11	15	13	14	43	1	1	7	5
2001	1	7	5	18	10	46	46	76	7	1	12	13	3	4	10	7		3	21	13	1	8	7	13	16	13	11	37	1	2	10	6
2002		4	3	19	8	55	61	69	3	2	17	8	4	11	13	8	3	2	18	11		17	11	10	15	15	18	53	1	3	8	12
2003		6	5	16	20	52	58	99	7	5	23	10	5	10	12	7	2	2	14	10	1	20	14	20	17	21	11	56		2	7	12
2004		4	11	21	16	67	83	106	6	4	26	16	3	9	16	7	1	1	15	10		11	16	15	7	16	5	32		2	7	14
2005		10	8	28	30	97	81	127	7	2	34	21	7	9	21	7	2	6	17	10	2	18	24	13	16	25	27	59	4	8	21	18
2006		14	5	19	30	93	92	134	4	6	32	19	3	18	22	11	1	6	20	25		16	15	22	19	30	19	53	8	12	25	26
2007	1	14	9	24	25	126	105	136	3	4	36	18	5	6	12	12		5	21	17		22	21	37	12	35	27	59	1	3	23	22
2008	2	11	7	25	29	126	100	147	9	10	54	30	4	10	23	14		8	24	21	1	22	26	20	19	43	24	47	5	10	25	14
2009	2	14	6	25	28	123	109	151	3	6	65	35	5	12	23	13	2	5	28	21	3	20	27	34	20	24	16	61	5	15	28	28
2010	3	13	17	30	25	131	128	182	4	5	62	39	5	13	20	18	2	9	35	38	1	38	36	29	17	34	24	69	6	14	38	25
2011	4	17	17	29	33	146	139	170	2	9	65	30	2	13	32	20	1	4	36	24		31	36	25	14	42	22	69	4	19	50	28
2012	4	17	27	27	38	163	157	205	5	10	59	21	4	11	27	21	1	3	43	23	2	32	59	32	23	43	24	70	3	9	43	27
2013	5	18	19	41	39	162	150	214	7	14	69	29	7	7	21	10	1	14	39	29		36	59	40	16	24	32	66	2	8	44	35
2014	1	18	24	41	40	197	148	233	2	11	66	44	4	11	19	19	1	11	33	36	1	37	57	44	18	56	32	59	1	13	45	37
2015	6	27	30	35	61	227	185	219	5	12	53	33	4	13	18	17	1	14	40	27		33	64	42	19	47	37	71	5	21	34	28
2016	3	21	37	38	56	220	178	221	6	21	74	32	9	13	25	22	1	11	48	32	1	30	67	37	17	59	33	51	4	22	42	27
2017		17	18	24	22	91	70	95	1	8	58	23	4	7	8	5		4	21	17	3	21	31	27	9	31	20	44		15	28	12
total	33	255	282	510	546	2301	2118	2899	83	137	829	454	91	210	373	248	19	131	545	426	16	440	605	488	392	629	436	1169	54	195	527	398
	1080				7864				1503				922				1121				1549				2626				1174
